# Supplementary material for: XPO1 Enables Adaptive Regulation of mRNA Export Required for Genotoxic Stress Tolerance in Cancer Cells
Source: PubMed Central journal article supplement — Cancer Res. 2023 Oct 6;84(1):101–17. doi: 10.1158/0008-5472.CAN-23-1992 (PMC10758694; doi:10.1158/0008-5472.can-23-1992), 2023-10-06
Supplement: can-23-1992_supplementary_data_suppsf1-sf5_st2-st4.pdf [file can-23-1992_supplementary_data_suppsf1-sf5_st2-st4.pdf]

## SUPPLEMENTARY FIGURES

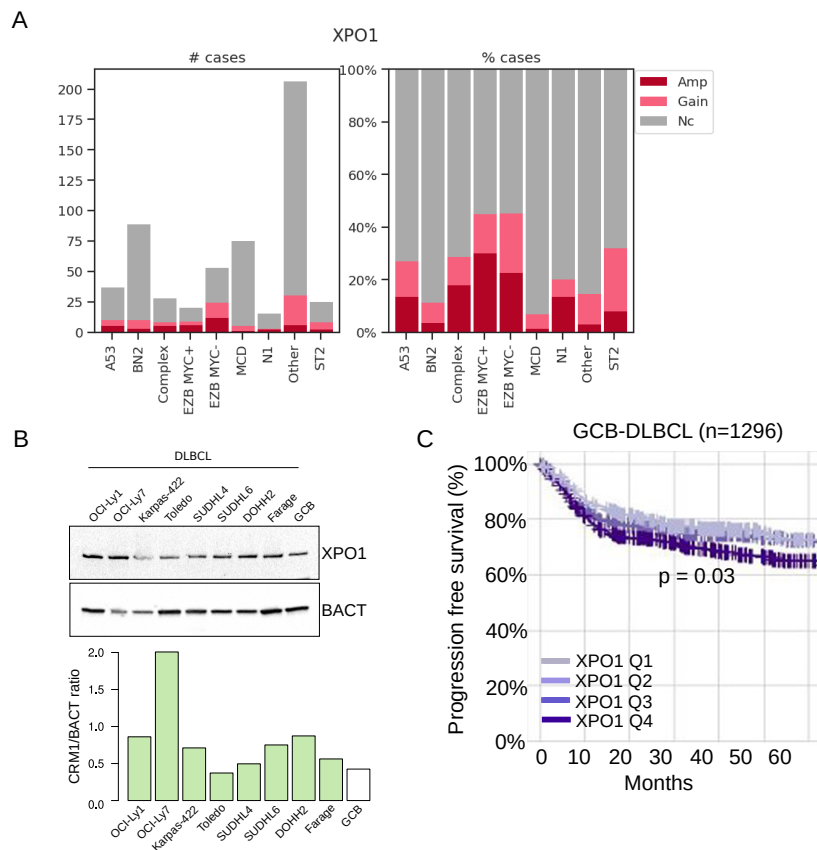

**Figure S1. A:** Distribution of XPO1 amplifications and gains according to LymphGen genetic subtypes. **B:** XPO1 protein expression in DLBCL cell lines (OCI-Ly7, OCI-Ly1, DoHH2, Toledo, Karpas422, Farage, SU-DHL6, SU-DHL4) and normal germinal center B cells (GCB) isolated from tonsils. Left panel: quantification. **C:** Kaplan-Meier survival curves of progression-free survival of 1,296 GCB-DLBCL patients stratified by XPO1 gene expression (RNA-sequencing) in quartiles (Q1: lowest, Q4: highest).

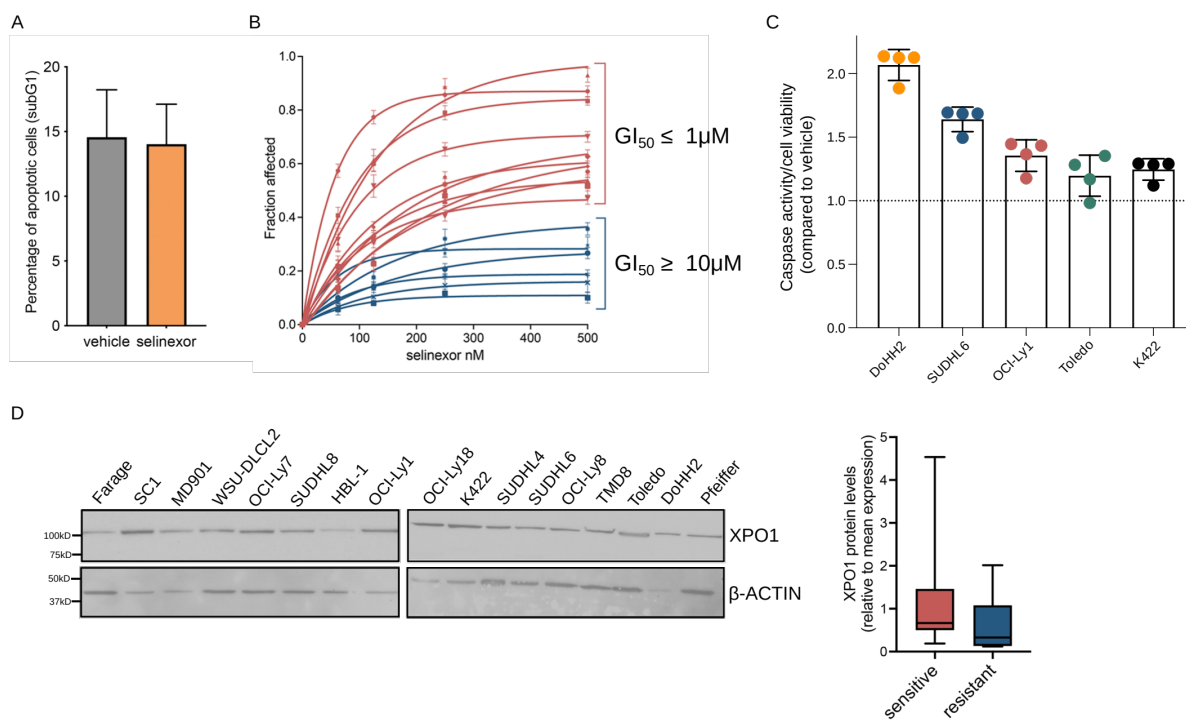

**Figure S2. A:** Apoptotic cells in P493-6 lymphoblastoid B cells upon MYC transgene induction followed by exposure to vehicle vs. selinexor. **B:** Dose-response curves of selinexor in a panel of 16 DLBCL cell lines. Growth inhibitory concentration 50% ( $GI_{50}$ ) for responsive (red) and resistant (blue) cell lines is indicated. **C:** Apoptosis (by caspase 7/3 activity) in selected DLBCL cell lines treated with selinexor 1  $\mu M$ . **D:** XPO1 expression in a panel of DLBCL cell lines and quantification of XPO1 expression in DLBCL cell lines segregated as sensitive or resistant to selinexor according to C.

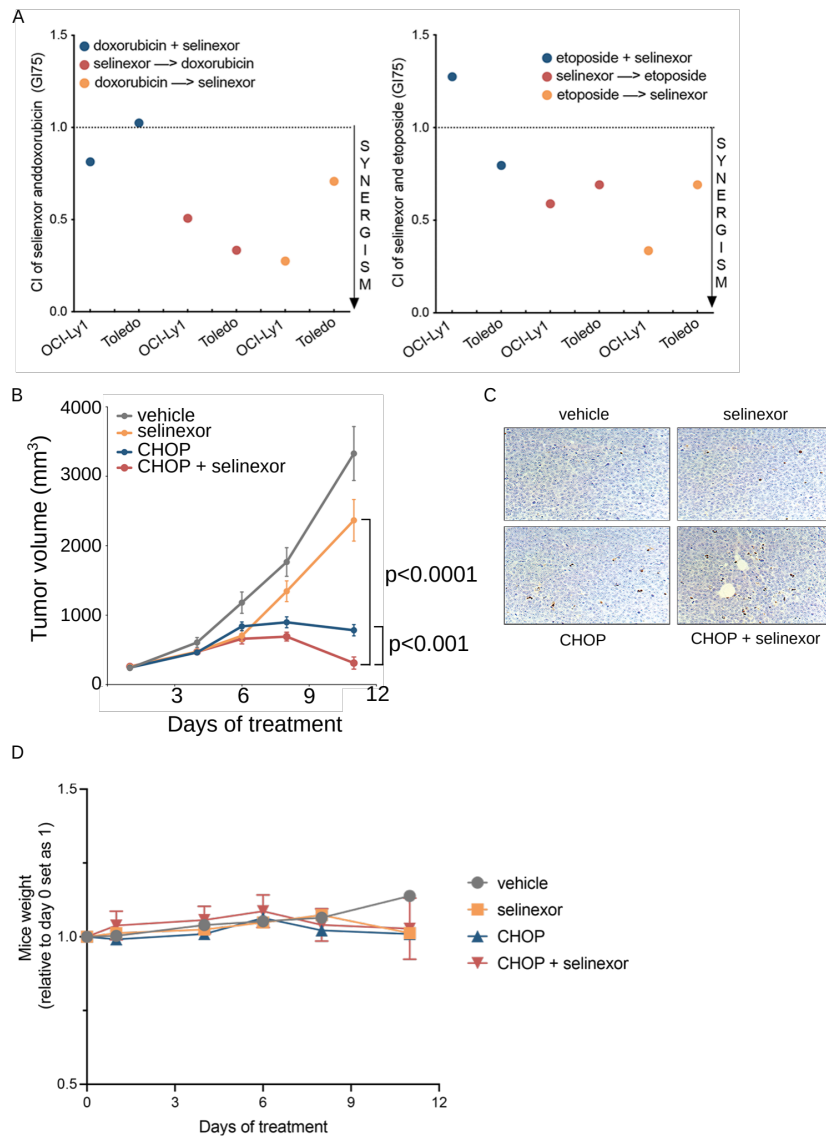

**Figure S3. A:** Combination index (CI) at GI<sub>75</sub> for selinexor with doxorubicin (left) or with etoposide (right) with three different administration schedules in two MYC-driven DLBCL cell lines Toledo and OCI-Ly1. **B:** normalized tumor growth curves of a MYC-driven XPO1-amplified DLBCL PDTX treated with vehicle, selinexor, CHOP or their combination. **C:** Representative apoptotic index (TUNEL) images from the experiment in B. **D:** Normalized mice weight from the mice in B.

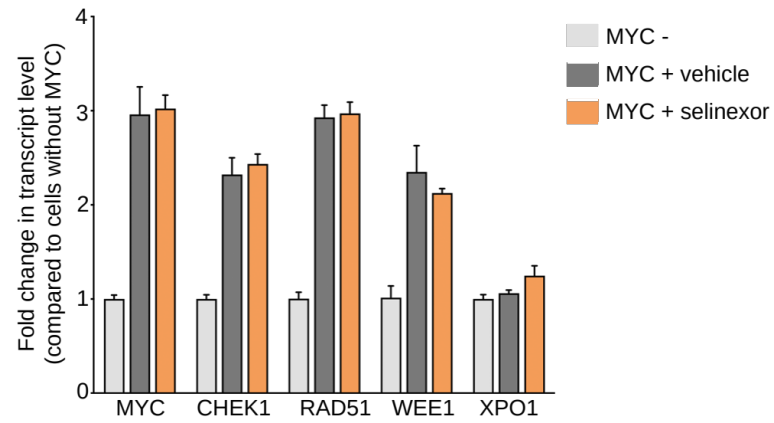

**Figure S4.** Expression levels of *MYC*, *XPO1* and DNA damage repair transcripts encoding for *CHEK1*, *RAD51* and *WEE1* in P493-6 lymphoblastoid B cell line after MYC induction followed by exposure to vehicle or selinexor for 6 h.

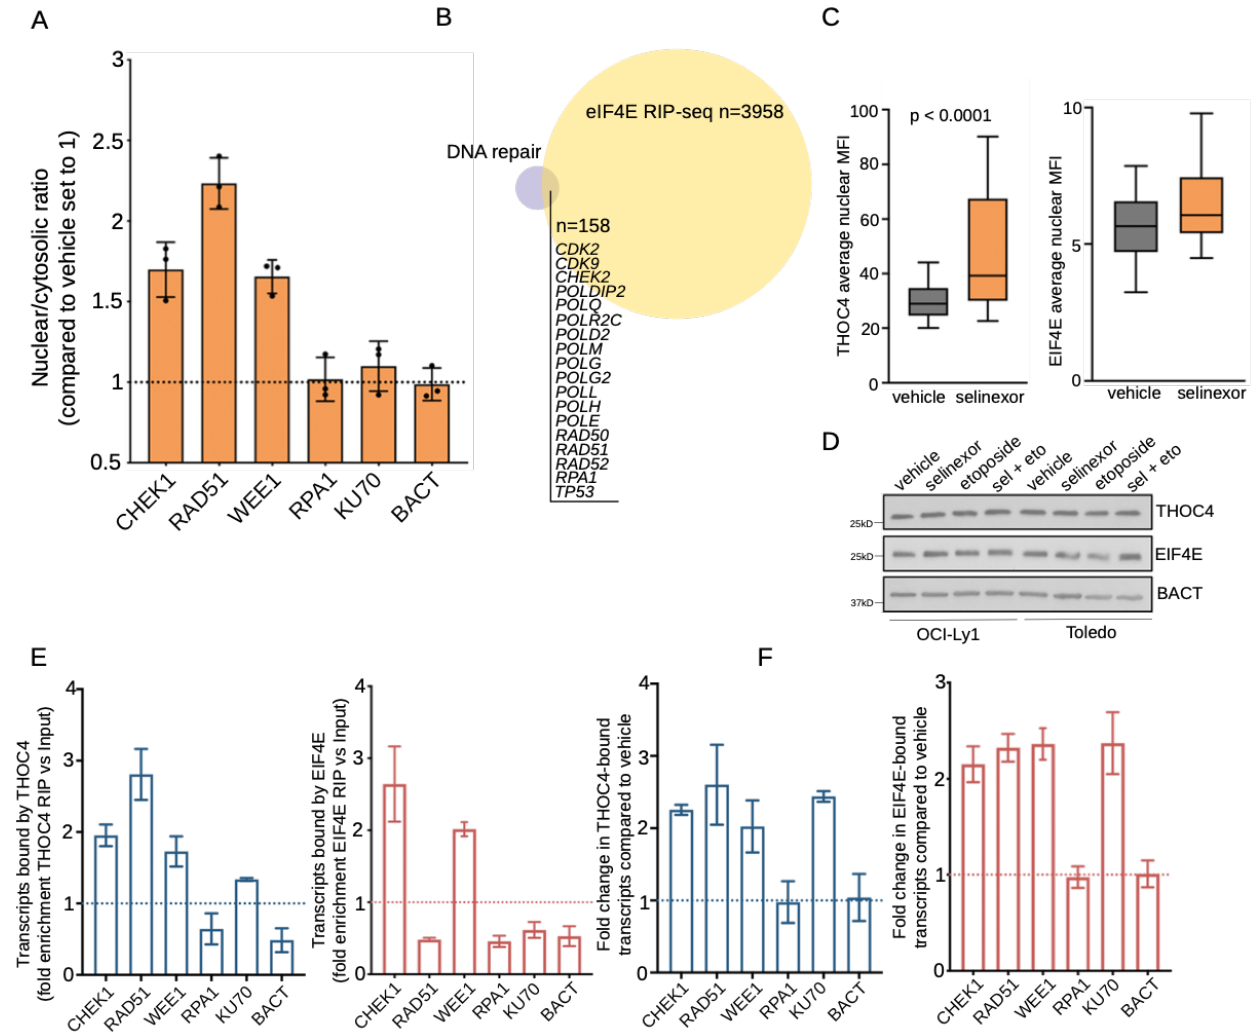

**Figure S5. A:** nuclear/cytoplasmic ratio of selected DNA damage repair transcripts (i.e., CHEK1, RAD51, WEE1, RPA1 and KU70) and BACT (control) in OCI-Ly1 cells exposed to vehicle or selinexor (1  $\mu$ M) for 6 h. **B:** Re-analysis of EIF4E RIP-sequencing in baseline OCI-Ly1 cells to show significantly bound transcripts (vs. IgG RIP-sequencing) belonging to the “DNA repair” category (n = 158). Selected transcripts names shown. **C:** nuclear levels of THOC4 and EIF4E in OCI-Ly1 cells exposed to vehicle or selinexor (1  $\mu$ M) for 6 h. **D:** immunoblotting of THOC4 and EIF4E in OCI-Ly1 and Toledo cells exposed to vehicle or selinexor (1  $\mu$ M), etoposide or their combination for 6 h. **E:** Ribonucleoprotein immunoprecipitation assays of DNA damage repair transcripts (i.e., CHEK1, RAD51, WEE1, RPA1 and KU70) bound by THOC4 (left) or EIF4E (right) in the nuclear fraction of OCI-Ly1 cells. Data are presented as fold enrichment over input. **F:** Change in the amount of DNA damage repair transcripts CHEK1, RAD51, WEE1, RPA1 and KU70 (and actin as control) bound by THOC4 (left) and EIF4E (right) in OCI-Ly1 lymphoma cells exposed to vehicle or etoposide for 6 h. Data are presented as fold enrichment over vehicle (normalized by their respective inputs).

## SUPPLEMENTARY TABLES

**Table S2: Patient Characteristics**

|                                       |                        |                   |
|---------------------------------------|------------------------|-------------------|
| <b>Age (years)</b>                    |                        | Median 67 (34-79) |
| <b>Sex</b>                            | Male: Female           | 14:8              |
| <b>Stage</b>                          | I-II                   | 6                 |
|                                       | III                    | 7                 |
|                                       | IV                     | 9                 |
| <b>International Prognostic Index</b> | Low                    | 5                 |
|                                       | Low Intermediate       | 9                 |
|                                       | High Intermediate      | 5                 |
|                                       | High                   | 3                 |
| <b>Diagnosis<sup>1</sup></b>          | DLBCL NOS <sup>2</sup> | 12                |
|                                       | DH-HGL <sup>3</sup>    | 4                 |
|                                       | TINHL <sup>4</sup>     | 2                 |
|                                       | PMBCL <sup>5</sup>     | 1                 |
|                                       | RT <sup>6</sup>        | 3                 |

<sup>1</sup>One subject with RT did not receive selinexor; <sup>2</sup>Diffuse large B-cell lymphoma not otherwise specified;

<sup>3</sup>Double-hit high-grade lymphoma; <sup>4</sup>Transformed indolent non-Hodgkin lymphoma; <sup>5</sup>Primary mediastinal large B-cell lymphoma; <sup>6</sup>Richter's transformation (chronic lymphocytic leukemia to DLBCL)

**Table S3:** Adverse Events, Grade 1-2 in  $\geq 10\%$  of Patients and All Grade 3-5 (n = 21)

(Number of patients according to highest grade experienced)

| Adverse Event<br>(# of patients)    | Grade 1 | Grade 2 | Grade 3 | Grade 4 | Grade 5 |
|-------------------------------------|---------|---------|---------|---------|---------|
| Platelet count decreased            | 22 (2)  | 10 (1)  | 16 (3)  | 17 (13) |         |
| Lymphocyte count decreased          | 6 (0)   | 13 (0)  | 23 (7)  | 10 (7)  |         |
| Neutrophil count decreased          | 2 (1)   | 3 (0)   | 9 (3)   | 11 (10) |         |
| Anemia                              | 14 (3)  | 20 (6)  | 10 (7)  |         |         |
| Fatigue                             | 15 (9)  | 6 (5)   |         |         |         |
| Hyponatremia                        | 8 (3)   |         | 13 (8)  |         |         |
| Alanine aminotransferase increase   | 7 (3)   |         | 2 (2)   |         |         |
| Aspartate aminotransferase increase | 4 (1)   | 1 (0)   | 2 (2)   |         |         |
| WBC count decreased                 |         | 5 (0)   | 4 (1)   | 8 (7)   |         |
| Nausea                              | 8 (5)   | 7 (5)   | 1 (1)   |         |         |
| Creatinine increase                 | 8 (3)   | 5 (3)   | 2 (1)   |         |         |
| Hypoalbuminemia                     | 6 (2)   | 9 (6)   |         |         |         |
| Hypocalcemia                        | 11 (5)  | 3 (3)   |         |         |         |
| Anorexia                            | 8 (8)   | 4 (3)   |         |         |         |
| Altered mental status               | 1 (1)   | 3 (2)   | 4 (4)   |         |         |
| Constipation                        | 6 (2)   | 2 (2)   |         |         |         |
| Hypokalemia                         | 7 (5)   |         |         |         |         |
| Abdominal pain                      | 4 (3)   | 1 (1)   | 1 (1)   |         |         |
| Sensory neuropathy                  | 4 (3)   | 2 (2)   |         |         |         |
| Hyperglycemia                       | 6 (3)   |         |         |         |         |
| Diarrhea                            | 4 (4)   | 1 (1)   |         |         |         |
| Hypomagnesemia                      | 5 (5)   |         |         |         |         |
| Alopecia                            | 4 (3)   | 1 (1)   |         |         |         |
| Alkaline phosphatase increase       | 3 (1)   | 1 (1)   |         |         |         |
| Febrile neutropenia                 |         |         | 3 (3)   |         | 1 (1)   |
| Hypophosphatemia                    | 1 (1)   | 1 (0)   | 2 (2)   |         |         |
| Weakness                            | 4 (3)   |         |         |         |         |
| Abdominal infection                 |         |         | 3 (1)   |         |         |
| Blood bilirubin increased           | 1 (1)   | 2 (2)   |         |         |         |
| Dyspnea                             | 3 (3)   |         |         |         |         |
| Fever                               | 3 (3)   |         |         |         |         |
| Acid reflux                         |         | 2 (2)   |         |         |         |
| Back pain                           | 1 (1)   |         | 1 (1)   |         |         |
| Bone pain                           | 2 (1)   |         |         |         |         |

| <b>Adverse Event<br/>(# of patients)</b> | <b>Grade 1</b> | <b>Grade 2</b> | <b>Grade 3</b> | <b>Grade 4</b> | <b>Grade 5</b> |
|------------------------------------------|----------------|----------------|----------------|----------------|----------------|
| Confusion                                |                | 2 (2)          |                |                |                |
| Chills                                   |                | 2 (2)          |                |                |                |
| Cough                                    | 2 (2)          |                |                |                |                |
| Edema (limbs)                            | 2 (2)          |                |                |                |                |
| Epistaxis                                | 1 (1)          | 1 (1)          |                |                |                |
| Fall                                     | 1 (1)          | 1 (1)          |                |                |                |
| Gait problem                             | 2 (2)          |                |                |                |                |
| Hypermagnesemia                          | 2 (2)          |                |                |                |                |
| Hypotension                              | 1 (1)          |                | 1 (1)          |                |                |
| Sepsis                                   |                |                |                | 1 (1)          | 1 (1)          |
| Syncope                                  |                |                | 2 (2)          |                |                |
| Urinary frequency                        | 2 (2)          |                |                |                |                |
| Urinary incontinence                     |                | 2 (2)          |                |                |                |
| Coronavirus (non COVID-19)               |                |                | 1 (1)          |                |                |
| Dehydration                              |                |                | 1 (1)          |                |                |
| Hypertension                             |                |                | 1 (1)          |                |                |
| Left shoulder weakness                   |                |                | 1 (1)          |                |                |
| Thromboembolic event                     |                |                | 1 (1)          |                |                |

**Table S4:** Stem cell information for those subjects in whom mobilization and collection was attempted

| Subject | Number of mobilization attempts | Number of collection attempts | Number of CD34 <sup>+</sup> cells (x 10 <sup>6</sup> /kg) | Underwent ASCT      |
|---------|---------------------------------|-------------------------------|-----------------------------------------------------------|---------------------|
| 1       | 1                               | 1                             | 4.17                                                      | No (allogeneic SCT) |
| 2       | 1                               | 1                             | 4.37                                                      | Yes                 |
| 3       | 2                               | 2                             | 5.66                                                      | Yes                 |
| 4       | 3                               | 3                             | 9.73                                                      | Yes                 |
| 5       | 2                               | 2                             | 2.18                                                      | No (allogeneic SCT) |
| 6       | 2                               | 0                             | Not applicable                                            | No                  |
| 7       | 1                               | 0                             | Not applicable                                            | No                  |
| 8       | 1                               | 0                             | Not applicable                                            | No                  |
